# Supplementary material for: ANGPTL4-Mediated Promotion of Glycolysis Facilitates the Colonization of Fusobacterium nucleatum in Colorectal Cancer
Source: PubMed Central journal article supplement — Cancer Res. 2021 Oct 13;81(24):6157–70. doi: 10.1158/0008-5472.CAN-21-2273 (PMC9397643; doi:10.1158/0008-5472.can-21-2273), 2021-10-13
Supplement: can-21-2273_supplementary_data_suppsf1-sf8_st1-st2.pdf [file can-21-2273_supplementary_data_suppsf1-sf8_st1-st2.pdf]

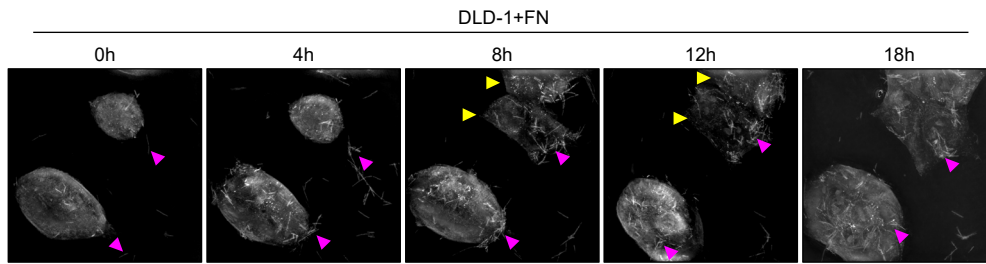

**Figure S1. Monitoring of DLD-1 and *F. nucleatum* co-culture.** Cells were grown to ~50% confluency, and then inoculated with *F. nucleatum* (FN) at a MOI of 10:1. Real-time observation of the co-culture was performed with a 3D Cell Explorer (Nanolive, Switzerland). Photos were taken at 5 min interval. Projected images were rendered with Image J. The *F. nucleatum* were indicated with magenta arrows, while the dividing cells were indicated with yellow arrows. Related to Fig 1.

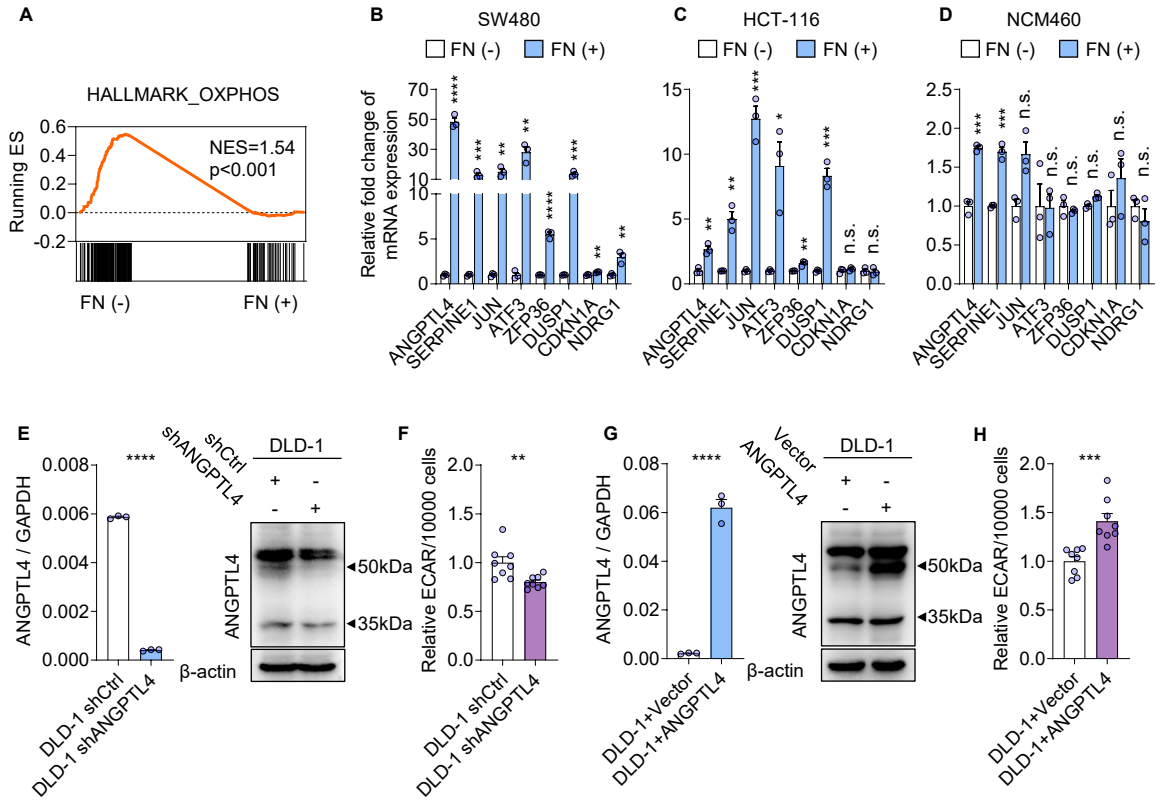

**Figure S2. F. nucleatum promotes glycolysis via inducing ANGPTL4 expression in CRC cells. (A)** Gene set enrichment analysis (GSEA) of RNA sequencing data compared the transcriptome of DLD-1 co-cultured with or without F. nucleatum (FN). ES, enrichment score; NES, net enrichment score; OXPPOS, oxidative phosphorylation. n=3 samples. **(B-D)** qPCR analysis of the selected genes in SW480 (B), HCT-116 (C) or NCM460 (D) co-cultured with or without F. nucleatum. n=3 samples. **(E)** qPCR and WB confirmation of the ANGPTL4 shRNA knockdown efficiency in DLD-1. shCtrl, non-target shRNA control; shANGPTL4, ANGPTL4-target shRNA. n=3 samples. **(F)** Relative ECAR of DLD-1 transfected with shCtrl or shANGPTL4. n=8 samples. **(G)** qPCR and WB confirmation of the ANGPTL4 overexpression efficiency of in DLD-1. n=3 samples. **(H)** Relative ECAR of DLD-1 transfected with empty vector or ANGPTL4-expressing plasmid. n=8 samples. The data were presented as mean  $\pm$  SEM. Each circle represented an individual sample. Samples were collected from 3 independent experiments in (B-H). For WB in (E and G), 2 independent experiments were performed with similar results. n.s. p>0.05, \*p<0.05, \*\*p<0.01, \*\*\*p<0.001, \*\*\*\*p<0.0001 by Wilcoxon rank-sum test or Welch ANOVA test for single or grouped analyses, respectively. Related to Fig 2.

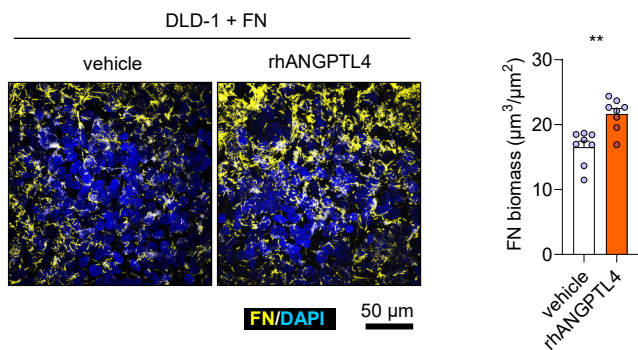

**Figure S3. Effect of rhANGPTL4 on *F. nucleatum* colonization.** Representative images and quantification of *F. nucleatum* (FN) stained with fluorescence in situ hybridization (FISH) in co-culture with DLD-1, treated with vehicle or recombinant human ANGPTL4 (rhANGPTL4; 5  $\mu\text{g}/\text{ml}$ ). Human cell nuclei were stained with DAPI. n=8 samples. The data were presented as mean  $\pm$  SEM. Each circle represented an individual sample. Samples were collected from 3 independent experiments. \*\*p<0.01 by Wilcoxon rank-sum test. Related to Fig 3.

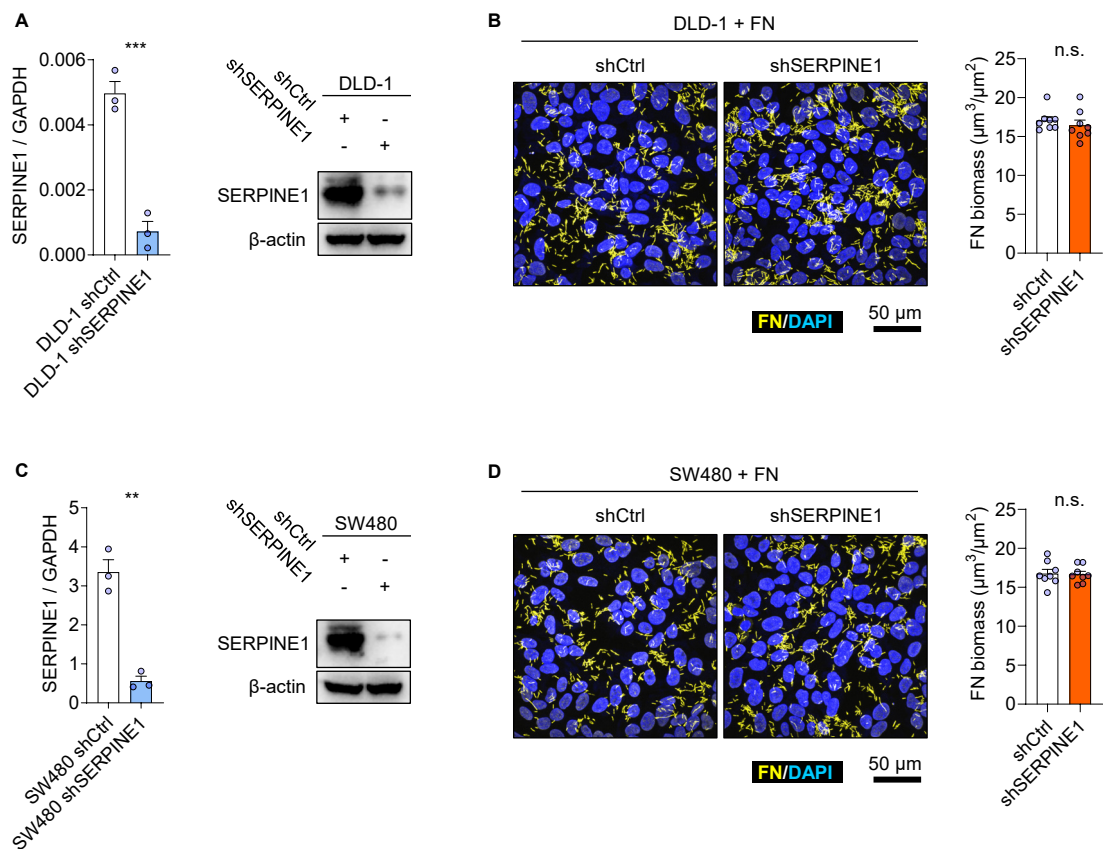

**Figure S4. *F. nucleatum* colonization does not rely on SERPINE1 expression of CRC cells.** (A and C) qPCR and WB confirmation of the SERPINE1 shRNA knockdown efficiency in DLD-1 (A) or SW480 (C). shCtrl, non-target shRNA control; shSERPINE1, SERPINE1-target shRNA. n=3 samples. (B and D) Representative images and quantification of *F. nucleatum* (FN) stained with fluorescence in situ hybridization (FISH) in co-culture with DLD-1 (B) or SW480 (D), transfected with non-target or SERPINE1-target shRNA. Human cell nuclei were stained with DAPI. n=8 samples. The data were presented as mean  $\pm$  SEM. Each circle represented an individual sample. Samples were collected from 3 independent experiments. For WB in (A and C), 2 independent experiments were performed with similar results. n.s.  $p > 0.05$ , \*\* $p < 0.01$ , \*\*\* $p < 0.001$  by Wilcoxon rank-sum test. Related to Fig 3.

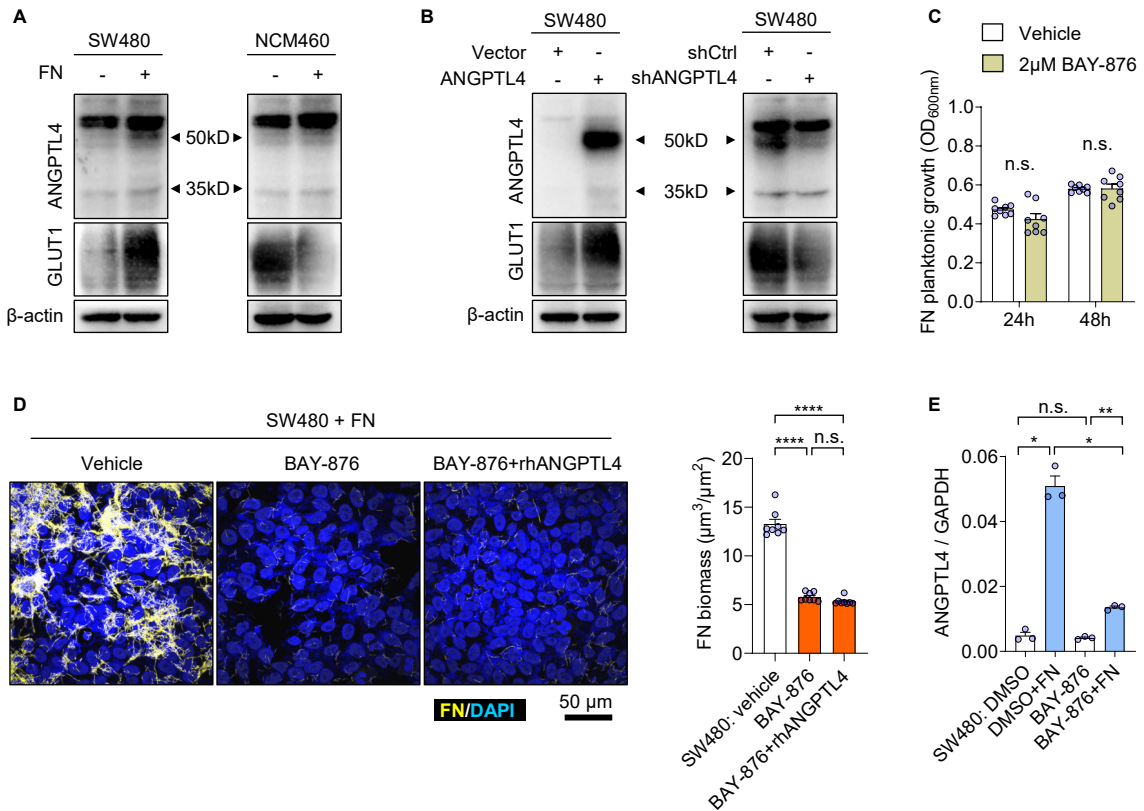

**Figure S5. ANGPTL4 facilitates *F. nucleatum* colonization by promoting GLUT1 expression and glucose uptake. (A)** WB analysis of ANGPTL4 and GLUT1 in SW480 or NCM460 co-cultured with or without *F. nucleatum*. **(B)** WB analysis of ANGPTL4 and GLUT1 in SW480 with ANGPTL4 overexpression or shRNA knockdown. The bands of ANGPTL4 in the upper panel of (A and B) were observed at 35 and 50 kDa according to the manufacturer's instruction. **(C)** Planktonic growth of *F. nucleatum* measure by optical density at 600 nm (OD<sub>600nm</sub>) under the treatment of vehicle or BAY-876. n=8 samples. **(D)** Representative images and quantification of FISH-stained *F. nucleatum* in co-culture with SW480, under the treatment of DMSO vehicle, BAY-876 (2 µM) or BAY-876 (2 µM) + rhANGPTL4 (5 µg/ml). Human cell nuclei were stained with DAPI. n=8 samples. **(E)** qPCR measurement of ANGPTL4 mRNA level in SW480 co-cultured with or without *F. nucleatum*, treated with or without BAY-876 (2 µM). n=3 samples. The data were presented as mean ± SEM. Each circle represented an individual sample. Samples were collected from 3 independent experiments in (C-E). For WB in (A and B), 2 independent experiments were performed with similar results. n.s. p>0.05, \*p<0.05, \*\*p<0.01, \*\*\*\*p<0.0001 by Wilcoxon rank-sum test or Welch ANOVA test for single or grouped analyses, respectively. Related to Fig 4.

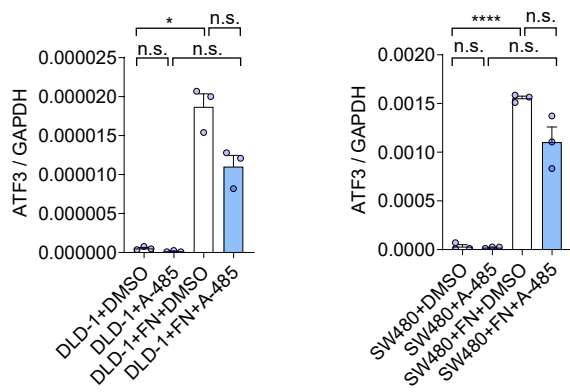

**Figure S6. The effect of A-485 on *F. nucleatum*-induced ATF3 expression in CRC cells.** ATF3 mRNA quantification in DLD-1 or SW480 cultured with or without *F. nucleatum* (FN), treated with DMSO vehicle or A-485 (1  $\mu$ M). n=3 samples. The data were presented as mean  $\pm$  SEM. Each circle represented an individual sample. Samples were collected from 3 independent experiments. n.s.  $p > 0.05$ , \* $p < 0.05$ , \*\* $p < 0.01$ , \*\*\* $p < 0.001$ , \*\*\*\* $p < 0.0001$  by Welch ANOVA. Related to Fig 6.

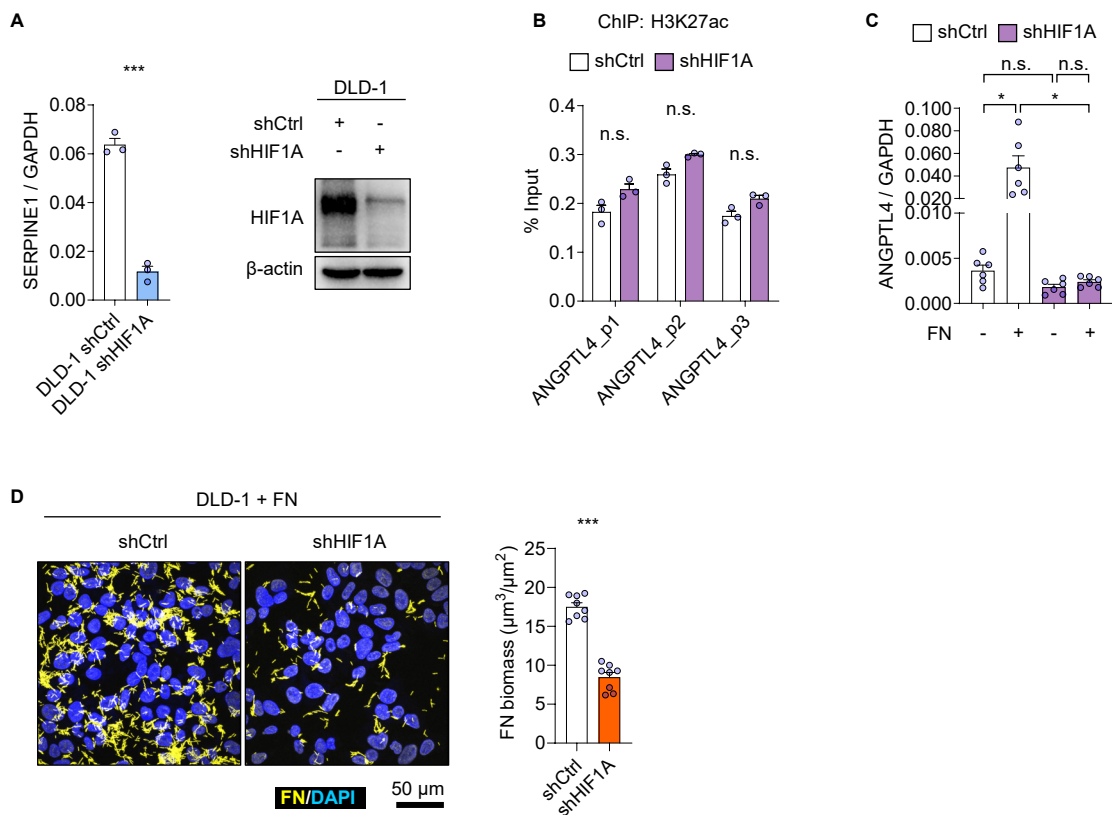

**Figure S7. HIF-1 $\alpha$  is required for *F. nucleatum*-induced ANGPTL4 expression and *F. nucleatum* colonization in DLD-1. (A)** qPCR and WB confirmation of the HIF1A shRNA knockdown efficiency in DLD-1. shCtrl, non-target shRNA control; shHIF1A, HIF1A-target shRNA. n=3 samples. **(B)** ChIP-qPCR analysis of the H3K27ac level within the promoter region of ANGPTL4, in DLD-1 transfected with non-target or HIF1A-target shRNA. Non-specific DNA immunoprecipitation in isotype IgG control was not detectable (qPCR CT value > 40) in all samples. n=3 samples. **(C)** ANGPTL4 mRNA quantification in DLD-1 cultured with or without *F. nucleatum* (FN). Cells were transfected with non-target or HIF1A-target shRNA. n=6 samples. **(D)** Representative images and quantification of FN stained with fluorescence in situ hybridization (FISH) in co-culture with DLD-1, transfected with non-target or HIF1A-target shRNA. Human cell nuclei were stained with DAPI. n=8 samples. The data were presented as mean  $\pm$  SEM. Each circle represented an individual sample. Samples were collected from 3 independent experiments. For WB in (A), 2 independent experiments were performed with similar results. n.s.  $p > 0.05$ , \* $p < 0.05$ , \*\*\* $p < 0.001$  by Wilcoxon rank-sum test or Welch ANOVA test for single or grouped analyses, respectively. Related to Fig 6.

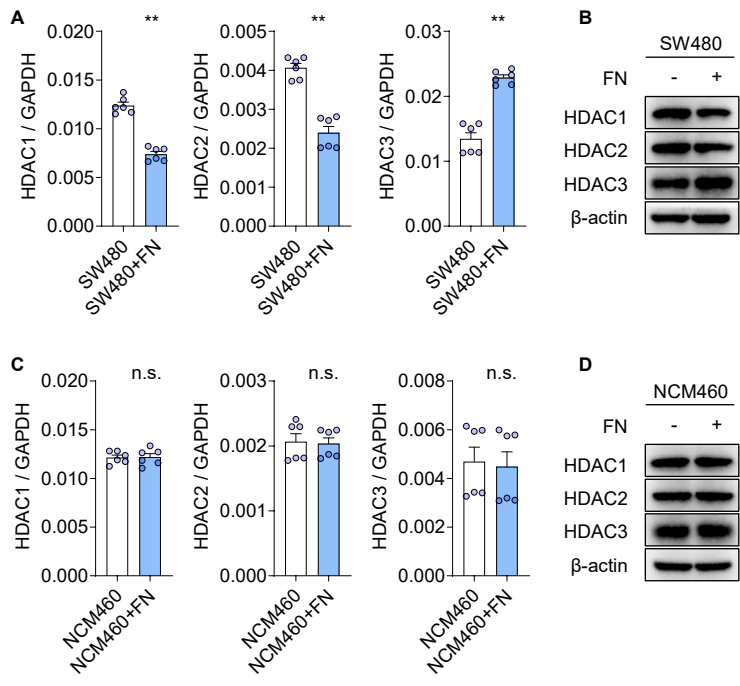

**Figure S8. HDACs quantification in SW480 or NCM460 co-cultured with or without *F. nucleatum*.** (A-D) HDAC1-3 mRNA (A and C; n=6 samples) and protein (B and D) levels quantified in SW480 (A and B) or NCM460 (C and D) co-cultured with or without *F. nucleatum* (FN). The data were presented as mean  $\pm$  SEM. Each circle represented an individual sample. Samples were collected from 3 independent experiments. For WB in (B and D), 2 independent experiments were performed with similar results. n.s.  $p > 0.05$ , \*\* $p < 0.01$  by Wilcoxon rank-sum test. Related to Fig 7.



**Table S1. Resources table.** Related to Fig 1-7.

| REAGENT or RESOURCE                                  | SOURCE                    | IDENTIFIER                          | USAGE                               |
|------------------------------------------------------|---------------------------|-------------------------------------|-------------------------------------|
| <b>Antibodies</b>                                    |                           |                                     |                                     |
| Rabbit monoclonal anti-ANGPTL4                       | Abcam                     | Cat# ab206420                       | 1:1000 for WB                       |
| Rabbit polyclonal anti- $\beta$ -actin               | Signalway Antibody        | Cat# 21338                          | 1:1000 for WB                       |
| Rabbit monoclonal anti-GLUT1                         | Abcam                     | Cat# ab115730<br>RRID: AB_10903230  | 1:100000 for WB                     |
| Rabbit monoclonal anti-SERPINE1 (PAI-1)              | Abcam                     | Cat# ab222754                       | 1:1000 for WB                       |
| Rabbit monoclonal anti-H3K27ac                       | Abcam                     | Cat# ab45173<br>RRID: AB_880445     | 1:1000 for WB<br>4 $\mu$ g per ChIP |
| Rabbit monoclonal anti-HIF-1 $\alpha$                | Cell Signaling Technology | Cat# 36169<br>RRID: AB_2799095      | 4 $\mu$ g per ChIP<br>1:1000 for WB |
| Rabbit polyclonal IgG                                | Merck Millipore           | Cat# PP648                          | 4 $\mu$ g per ChIP                  |
| Rabbit polyclonal anti-histone-H3                    | Proteintch                | Cat# 17168-1-AP<br>RRID: AB_2716755 | 1:1000 for WB                       |
| Rabbit monoclonal anti-HDAC1                         | Abcam                     | Cat# ab109411<br>RRID: AB_10861012  | 1:1000 for WB                       |
| Rabbit monoclonal anti-HDAC2                         | Abcam                     | Cat# ab32117<br>RRID: AB_732777     | 1:2000 for WB                       |
| Rabbit monoclonal anti-HDAC3                         | Abcam                     | Cat# ab32369<br>RRID: AB_732780     | 1:5000 for WB                       |
| Goat anti-rabbit HRP conjugated IgG H&L              | Abcam                     | Cat# ab6721<br>RRID: AB_955447      | 1:10000 for WB                      |
| <b>Chemicals, Peptides, and Recombinant Proteins</b> |                           |                                     |                                     |
| 2-DG                                                 | APEXBIO                   | Cat# B1027                          | 20 mM in vitro<br>1g/kg in vivo     |
| rhANGPTL4                                            | R&D Systems               | Cat# 3485-AN-050                    | 5 $\mu$ g/ml                        |

|                                          |                                |                  |                                                                |
|------------------------------------------|--------------------------------|------------------|----------------------------------------------------------------|
| A-485                                    | MedChemEx<br>press             | Cat# HY-107455   | 1 $\mu$ M                                                      |
| BAY-876                                  | MedChemEx<br>press             | Cat# HY-100017   | 2 $\mu$ M                                                      |
| Gentamicin                               | APEX BIO                       | Cat# A2514       | 300 $\mu$ g/ml                                                 |
| Metronidazole                            | APEX BIO                       | Cat# B1976       | 200 $\mu$ g/ml                                                 |
| 2-NBDG                                   | APEX BIO                       | Cat# B6035       | 200 $\mu$ M for<br>glucose uptake<br>assay                     |
| Recombinant human<br>HDAC1               | Proteintech                    | Cat# Ag0256      | 2 $\mu$ g per assay<br>well in HDAC<br>activity<br>measurement |
| Recombinant human<br>HDAC2               | Proteintech                    | Cat# Ag3607      | 2 $\mu$ g per assay<br>well in HDAC<br>activity<br>measurement |
| <b>Critical Commercial Assays</b>        |                                |                  |                                                                |
| Glycolysis Assay kit                     | Abcam                          | Cat# ab197244    | ECAR evaluation                                                |
| QIAamp DNA Mini kit                      | QIAGEN                         | Cat# 51304       | gDNA extraction                                                |
| MiniBest Universal RNA<br>Extraction kit | Takara                         | Cat# 15596026    | RNA extraction                                                 |
| TruSeq™ RNA sample<br>preparation kit    | Illumina                       | Cat# RS-122-2001 | cDNA library<br>construction                                   |
| pcDNA™ 3.1/Zeo <sup>(+)</sup>            | Thermo<br>Fisher<br>Scientific | Cat# V86020      | Eukaryotic<br>expression<br>plasmid<br>construction            |
| Lipofectamine 2000                       | Thermo<br>Fisher<br>Scientific | Cat# 11668019    | Transfection                                                   |
| RT reagent Kit with gDNA<br>Eraser       | Takara                         | Cat# RR047A      | RT-PCR                                                         |
| TB Green® Premix Ex<br>Taq™              | Takara                         | Cat# RR420L      | qPCR                                                           |

|                                                             |                             |                                                                                                                    |                           |
|-------------------------------------------------------------|-----------------------------|--------------------------------------------------------------------------------------------------------------------|---------------------------|
| Cell lysis buffer                                           | Beyotime                    | Cat# P0013                                                                                                         | Protein extraction        |
| NE-PER™ Nuclear and Cytoplasmic Extraction Reagents         | Thermo Fisher Scientific    | Cat# 78833                                                                                                         | Protein extraction        |
| Enhanced BCA Protein Assay kit                              | Beyotime                    | Cat# P0010                                                                                                         | Protein quantification    |
| Immobilon ECL Ultra Western HRP Substrate                   | Merck Millipore             | Cat# WBULS0500                                                                                                     | For WB                    |
| EZ-Zyme™ Enzymatic Chromatin Prep kit                       | Merck Millipore             | Cat# 17-375                                                                                                        | For ChIP                  |
| Magna ChIP™ HiSens Kit                                      | Merck Millipore             | Cat# 17-10460                                                                                                      | For ChIP                  |
| MicroElute® DNA Clean-Up kit                                | Omega                       | Cat# D6296                                                                                                         | DNA purification          |
| Diphenylene diamine (DAB) system                            | Absin                       | Cat# abs957                                                                                                        | For IHC                   |
| FLUOR DE LYS® HDAC Fluorometric Cellular Activity Assay kit | Enzo Life Sciences          | Cat# BML-AK503                                                                                                     | HDAC activity measurement |
| <b>Oligonucleotides</b>                                     |                             |                                                                                                                    |                           |
| FUS714 probe conjugated with Alexa Fluor 555                | Valm AM. et al., 2011       | 5'GGCTTCCCATCG GCATT3'                                                                                             | 200 nM for FISH           |
| F. nucleatum 16S rDNA qPCR primers                          | Castellarin M. et al., 2012 | Forward:<br>5'CAACCATTACTTTA<br>ACTCTACCATGTTCA<br>3'<br>Reverse:<br>5'GTTGACTTTACAG<br>AAGGAGATTATGTAA<br>AAATC3' | For qPCR                  |

|                       |                                   |                                                                                         |          |
|-----------------------|-----------------------------------|-----------------------------------------------------------------------------------------|----------|
| PGT qPCR primers      | Castellarin<br>M. et al.,<br>2012 | Forward:<br>5'ATCCCCAAAGCAC<br>CTGGTTT3'<br>Reverse:<br>5'AGAGGCCAAGATA<br>GTCCTGGTAA3' | For qPCR |
| ANGPTL4 qPCR primers  | This study                        | Forward:<br>5'GAGTTGCTGCAGT<br>TCTCCGT3'<br>Reverse:<br>5'AAACCACCAGCCT<br>CCAGAGA3'    | For qPCR |
| SERPINE1 qPCR primers | This study                        | Forward:<br>5'TGGTTCTGCCCAA<br>GTTCTCC3'<br>Reverse:<br>5'CACCGTGCCACTC<br>TCGTTCC3'    | For qPCR |
| JUN qPCR primers      | This study                        | Forward:<br>5'GGAGACAAGTGGC<br>AGAGTCC3'<br>Reverse:<br>5'CTCGCCCAAGTTC<br>AACAACC3'    | For qPCR |
| ATF3 qPCR primers     | This study                        | Forward:<br>5'ACAGCTCTTTCT<br>CTCGCCG3'<br>Reverse:<br>5'TGAAGCATCATTTT<br>GCTCCAGG3'   | For qPCR |

|                     |            |                                                                                        |          |
|---------------------|------------|----------------------------------------------------------------------------------------|----------|
| ZFP36 qPCR primers  | This study | Forward:<br>5'GACTGCCATCTAC<br>GAGAGCC3'<br>Reverse:<br>5'CACTAGGCTGGTG<br>GAGCG3'     | For qPCR |
| DUSP1 qPCR primers  | This study | Forward:<br>5'GGCCATTGACTTC<br>ATAGACTCC3'<br>Reverse:<br>5'ATGATGCTTCGCC<br>TCTGCTT3' | For qPCR |
| CDKN1A qPCR primers | This study | Forward:<br>5'GCAGACCAGCATG<br>ACAGATTT3'<br>Reverse:<br>5'GGCCAGGGTATGT<br>ACATGAGG3' | For qPCR |
| NDRG1 qPCR primers  | This study | Forward:<br>5'CCCTCGCGTTAGG<br>CAGGT3'<br>Reverse:<br>5'CCGATGTCATGGT<br>AGGTGAGG3'    | For qPCR |
| GLUT1 qPCR primers  | This study | Forward:<br>5'TCTGGCATCAACG<br>CTGTCTT3'<br>Reverse:<br>5'AACAGCGACACGA<br>CAGTGAA3'   | For qPCR |

|                                     |            |                                                                                           |               |
|-------------------------------------|------------|-------------------------------------------------------------------------------------------|---------------|
| HDAC1 qPCR primers                  | This study | Forward:<br>5'CATCGCTGTGAAT<br>TGGGCTG3'<br>Reverse:<br>5'ACCCTCTGGTGAT<br>ACTTTAGCAG3'   | For qPCR      |
| HDAC2 qPCR primers                  | This study | Forward:<br>5'GTTTCCCTCAGCC<br>CTTTTCT3'<br>Reverse:<br>5'ATAATTTCCAATAT<br>CACCGTCGTAG3' | For qPCR      |
| HDAC3 qPCR primers                  | This study | Forward:<br>5'GGCCTATTTCTAC<br>GACCCCG3'<br>Reverse:<br>5'TGGTATGGCTTGA<br>AGACGATCA3'    | For qPCR      |
| GAPDH qPCR primers                  | This study | Forward:<br>5'GGAGCGAGATCCC<br>TCCAAAAT3'<br>Reverse:<br>5'GGCTGTTGTCATA<br>CTTCTCATGG3'  | For qPCR      |
| H3K27ac ChIP:<br>ANGPTL4_P1 primers | This study | Forward:<br>5'ATGTGGTCCAGCC<br>CTTTAGC3'<br>Reverse:<br>5'TCTAAGCCCAGCC<br>CCTGTAT3'      | For ChIP-qPCR |

|                                     |                              |                                                                                      |                             |
|-------------------------------------|------------------------------|--------------------------------------------------------------------------------------|-----------------------------|
| H3K27ac ChIP:<br>ANGPTL4_P2 primers | This study                   | Forward:<br>5'TGCGATGACGAAC<br>CCTTTCA3'<br>Reverse:<br>5'CTTCGTGTGACCT<br>CCATCCC3' | For ChIP-qPCR               |
| H3K27ac ChIP:<br>ANGPTL4_P3 primers | This study                   | Forward:<br>5'GGGGCTTGCAATT<br>TCACACT3'<br>Reverse:<br>5'CAGGCCTTCCTCT<br>ACGAACC3' | For ChIP-qPCR               |
| HIF-1α ChIP:<br>ANGPTL4_P1 primers  | This study                   | Forward:<br>5'CCTTGGGTGTGCA<br>GTTTCAG3'<br>Reverse:<br>5'GCCTCTTCCCTAC<br>CCATTCC3' | For ChIP-qPCR               |
| HIF-1α ChIP:<br>ANGPTL4_P2 primers  | This study                   | Forward:<br>5'GCAATTTTCACTA<br>GAGGCGG3'<br>Reverse:<br>5'CAGGCCTTCCTCT<br>ACGAACC3' | For ChIP-qPCR               |
| shANGPTL4                           | Padua D. et<br>al., 2008     | 5'GAGGCAGAGTGG<br>ACTATTT3'                                                          | For ANGPTL4<br>knockdown    |
| shSERPINE1                          | Sigma,<br>TRCN00003<br>31004 | 5'TCTCTGCCCTCAC<br>CAACATTC3'                                                        | For SERPINE1<br>knockdown   |
| shHIF1A                             | Sigma,<br>TRCN00000<br>3810  | 5'GTGATGAAAGAAT<br>TACCGAAT3'                                                        | For HIF1A<br>knockdown      |
| shCtrl                              | This study                   | 5'AAACGTGACACGT<br>TCGAGAA3'                                                         | Non-target control<br>shRNA |
| <b>Deposited Data</b>               |                              |                                                                                      |                             |

|                                |                          |                                                                                               |                                                                                 |
|--------------------------------|--------------------------|-----------------------------------------------------------------------------------------------|---------------------------------------------------------------------------------|
| RNA-seq raw data               | This study               | Gene Expression Omnibus, accession no. GSE175593                                              | Compare the transcriptome between DLD-1 co-culture with or without F. nucleatum |
| <b>Software and Algorithms</b> |                          |                                                                                               |                                                                                 |
| R version 4.0.2                | N/A                      | <a href="https://www.r-project.org/">https://www.r-project.org/</a>                           | RNA-seq analysis                                                                |
| GDCRNATools (R package)        | N/A                      | <a href="https://www.r-project.org/">https://www.r-project.org/</a>                           | RNA-seq analysis                                                                |
| I-Sanger                       | Majorbio co.             | <a href="http://www.i-sanger.com/">http://www.i-sanger.com/</a>                               | RNA-seq analysis                                                                |
| Image J                        | NIH                      | <a href="https://imagej.nih.gov/ij">https://imagej.nih.gov/ij</a><br>RRID:SCR_003070          | Image process and analysis                                                      |
| COMSTAT2 (Image J plugin)      | Heydorn A. et al., 2000  | <a href="http://www.comstat.dk">http://www.comstat.dk</a>                                     | Biomass quantification                                                          |
| IHC profiler (Image J plugin)  | Varghese F. et al., 2014 | <a href="https://github.com/dbra nt/ihc-profiler">https://github.com/dbra nt/ihc-profiler</a> | IHC score quantification                                                        |
| GraphPad Prism version 8.0.1   | Insightful Science       | N/A<br>RRID:SCR_002798                                                                        | Data presentation and statistical analysis                                      |



**Table S2. Information for colon adenocarcinoma tissues analysis.** Related to Fig 5.

| Patient ID | Gender | Age | AJCC stage | H3K27ac IHC score | Fn FISH positive area% |
|------------|--------|-----|------------|-------------------|------------------------|
| 0019000316 | Female | 52  | IIB        | 0.040875          | 0.561395               |
| 0032319839 | Female | 65  | IIIB       | 6.53748           | 6.160114               |
| 0032353020 | Male   | 72  | IIA        | 1.709006          | 0.456252               |
| 0032369867 | Male   | 53  | IIIC       | 15.50472          | 1.074149               |
| 0032148208 | Female | 49  | IIA        | 3.593425          | 0.308743               |
| 0019738587 | Female | 57  | IIIB       | 56.1506           | 18.1636                |
| 0000449348 | Female | 87  | IIIB       | 15.56516          | 2.515795               |
| 0032490219 | Male   | 56  | IIB        | 33.1516           | 0.964906               |
| 0021090254 | Female | 40  | I          | 3.62716           | 0.712857               |
| 0032490770 | Male   | 85  | IIIC       | 47.1219           | 3.096782               |
| 0008498282 | Male   | 74  | IIIC       | 25.7169           | 2.574479               |
| 0007638115 | Male   | 75  | IIB        | 6.51762           | 0.398631               |
| 0012244820 | Female | 47  | IIIC       | 5.272276          | 2.048468               |
| 0032381367 | Male   | 60  | IIIC       | 8.709603          | 1.862457               |
| 0032580425 | Female | 53  | IIIC       | 47.1219           | 9.407131               |
| 0033045065 | Male   | 64  | IIIC       | 19.20076          | 4.144113               |
| 0033090272 | Female | 60  | IIIC       | 24.41642          | 2.43151                |
| 0033106136 | Male   | 64  | IIIB       | 15.4771           | 4.96245                |
| 0033110883 | Female | 50  | IIB        | 8.71928           | 1.835791               |
| 0002255365 | Male   | 40  | IIA        | 8.22492           | 1.053122               |
| 0018247017 | Female | 46  | I          | 2.296282          | 0.129506               |
| 0019000316 | Female | 52  | IIB        | 29.5688           | 0.936108               |
| 0032319839 | Female | 65  | IIIB       | 8.097713          | 4.613394               |
| 0032277625 | Male   | 30  | IIC        | 10.0008           | 2.663626               |
| 0017018303 | Male   | 63  | I          | 4.295234          | 0.286549               |
| 2353020    | Male   | 72  | IIA        | 5.66402           | 0.273557               |
| 0032369867 | Male   | 53  | IIIC       | 43.02794          | 11.63048               |
